# Supplementary material for: Social Exclusion among Peers: The Role of Immigrant Status and Classroom Immigrant Density
Source: Springer Nature journal article supplement (doi:10.1007/s10964-016-0564-5), 2016-09-12
Supplement: MOESM1 [file 10693716]

Table 1a. Sensitivity tests for dichotomous coding of rejection: at least one nomination and at least 2 nominations

|  | Rejection 1+ nominations (63%) | | | Rejection 2+ nominations (40%) | | |
| --- | --- | --- | --- | --- | --- | --- |
|  | Model 1 | Model 2 | Model 3 | Model 1 | Model 2 | Model 3 |
| **Immigrant status** |  |  |  |  |  |  |
| Swedish majority | Ref. | Ref. | Ref. | Ref. | Ref. | Ref. |
| 2nd gen European/Western | .10 (.04)** | .10 (.04)** | .11 (.04)** | .13 (.05)** | .13 (04)** | .15 (05)** |
| 2nd gen Non-European/Western | .11 (.03)*** | .09 (.02)*** | .10 (.03)*** | .09 (03)** | .07 (.03)* | .10 (.03)** |
| 1st gen European/Western | .14 (.04)** | .13 (.05)** | .14 (.05)** | .16 (.06)** | .14 (.06)* | .16 (.06)** |
| 1st gen Non-European/Western | .12 (.04)** | .09 (.04)* | .10 (.04)* | .15 (.04)*** | .11 (.04)** | .13 (.04)** |
| **Gender -female** |  | -.07 (.02)* | -.07 (.02)* |  | -.05 (.02)* | -.05 (.02)* |
| **Cognitive ability** |  | -.05 (.01)*** | -.05 (.01)*** |  | -.05 (.01)*** | -.05 (.01)*** |
| **Other family structure** |  | -.03 (.02) | -.03 (.02) |  | -.03 (.01) | -.03 (.02) |
| **Household income** |  | -.01 (.01) | -.01 (.01) |  | -.02 (.01)* | -.02 (.01)* |
| **Parental education** |  | -.01 (.01) | -.01 (.01) |  | -.03 (.01)** | -.03 (.01)** |
| **Immigrant density - categorical** | |  |  |  |  |  |
| 0-20% |  |  | Ref. |  |  | Ref. |
| 21-49% |  |  | -.01 (.03) |  |  | -.04 (.03) |
| 50-100% |  |  | -.01 (.04) |  |  | -.07 (.03)* |
| **Number of classmates** |  |  | -.01 (.01) |  |  | .01 (.01) |

*Note.* + p < .09; * *p* < .05; ** *p* < .01; *** *p* < .001

Table 1b. Sensitivity tests for continuous coding rejection: total nominations and standardized around class mean

|  | Rejection total nominations (continuous) | | | | | Rejection standardized (continuous) | | |
| --- | --- | --- | --- | --- | --- | --- | --- | --- |
|  | Model 1 | | | Model 1 | Model 3 | Model 1 | Model 2 | Model 1 |
| **Immigrant status** |  | | |  |  |  |  |  |
| Swedish majority | Ref. | | | Ref. | Ref. | Ref. | Ref. | Ref. |
| 2nd gen European/Western | .46 (.17)** | | | .43 (.16)* | .53 (.17)** | .24 (.09)** | .23 (.08)** | .28 (.09)** |
| 2nd gen Non-European/Western | .32 (.11)** | | | .21 (.10)* | .35 (.11)** | .17 (.05)** | .12 (.05)* | .19 (.06)** |
| 1st gen European/Western | .76 (.23)** | | | .69 (.23)** | .77 (.23)** | .39 (.12)** | .35 (.12)** | .40 (.12)** |
| 1st gen Non-European/Western | .51 (.16)** | | | .34 (.16)* | .45 (.17)** | .28 (.08)** | .19 (.08)* | .26 (.08)** |
| **Gender -female** |  | | | -.23 (.09)** | -.22 (.09)** |  | -.14 (.04)** | -.14 (.04)** |
| **Cognitive ability** |  | | | -.22 (.04)*** | -.22 (.04)*** |  | -.11 (.02)*** | -.10 (.02)*** |
| **Other family structure** |  | | | .12 (.07)+ | .14 (.07)+ |  | .05 (.04) | .06 (.04) |
| **Household income** |  | | | -.08 (.03)* | -.07 (.03)* |  | -.05 (.02)* | -.04 (.02)* |
| **Parental education** |  | | | -.11 (.04)** | -.10 (.04)** |  | -.06 (.02)** | -.06 (.02)** |
| **Immigrant density - categorical** | |  |
| 0-20% |  | | |  | Ref. |  |  | -.06 (.02)* |
| 21-49% |  | | |  | -.14 (.09) |  |  | -.15 (.04)*** |
| 50-100% |  | | |  | -.39 (.11)** |  |  | -.01 (.01) |
| **Number of classmates** |  | | |  | .03 (.01)* |  |  | -.01 (.01) |

*Note.* + p < .09; * *p* < .05; ** *p* < .01; *** *p* < .001

Table 2. Significant interaction effects between immigrant status and classroom immigrant density

| Outcome | Interaction | Immigrant density | |
| --- | --- | --- | --- |
|  |  | Categorical | Continuous |
| Rejection 1+ | 2nd gen European/Western*high dense/increasing density | -.15 (.08)+ | -.22 (.11)* |
| Rejection 1+ | 2nd gen Non-European/Western*high dense/increasing density | -.18 (.07)** | -.20 (.09)* |
| Rejection 2+ | 2nd gen European/Western*high dense/increasing density | -.26 (.10)** | -.42 (.15)** |
| Rejection 2+ | 2nd gen Non-European/Western*high dense/increasing density | -.25 (.08)** | -.33 (.10)** |
| Rejection cont. | 2nd gen European/Western*high dense/increasing density | -.94 (.38)* | -1.48 (.53)** |
| Rejection cont. | 2nd gen Non-European/Western*high dense/increasing density | -.79 (.26)** | -1.01 (.34)** |
| Rejection std. | 2nd gen European/Western*high dense/increasing density | -.30 (.21) | -.43 (.31) |
| Rejection std. | 2nd gen Non-European/Western*high dense/increasing density | -.30 (.15)* | -.35 (.17)* |

*Note.* + p < .07; * *p* < .05; ** *p* < .01; *** *p* < .001

Note that coefficients for the standardised rejection nominations of 2nd gen European youth are on par with Non-European youth. However, standard errors are larger due to smaller sample size.

Figure 1. Rejection 1+ nominations – interactions between immigrant status and classroom immigrant density

Figure 2. Rejection 2+ nominations – interactions between immigrant status and classroom immigrant density

Figure 3. Rejection total nominations – interactions between immigrant status and classroom immigrant density

Figure 4. Rejection standardised nominations – interactions between immigrant status and classroom immigrant density
